# Supplementary material
Source: MDPI journal article supplement (https://www.mdpi.com/2076-0760/11/2/42)
Supplement: s1 [file s1]

**Table S1.** Results of exploratory factor analyses of scales used in the study.

|                                                                                                              | <b>Total Variance<br/>Explained</b> | <b>Factor<br/>Loading</b> |
|--------------------------------------------------------------------------------------------------------------|-------------------------------------|---------------------------|
| Learning and self-regulation difficulties during online studying                                             | 66.32%                              |                           |
| I find it harder to regulate and discipline myself during online studying.                                   |                                     | 0.87                      |
| I have difficulties in constraining myself to fulfil my studying-related assignments during online studying. |                                     | 0.87                      |
| My capability in fulfilling studying-related assignments is poorer during online studying.                   |                                     | 0.79                      |
| I have difficulties comprehending content during online studying.                                            |                                     | 0.77                      |
| It is harder for me to stay focused during online studying.                                                  |                                     | 0.76                      |
| Perceived lack of social interactions in an online learning environment                                      | 67.93%                              |                           |
| Interactions with other students are downsized during online education.                                      |                                     | 0.86                      |
| Interactions with teachers are downsized during online education.                                            |                                     | 0.84                      |
| Online education contributes to my feelings of social isolation.                                             |                                     | 0.78                      |
| Perceived level of life disruption                                                                           | 49.35%                              |                           |
| Family relationships domain                                                                                  |                                     | 0.75                      |
| Friendships domain                                                                                           |                                     | 0.72                      |
| Free time domain                                                                                             |                                     | 0.74                      |
| Health in general                                                                                            |                                     | 0.75                      |
| Educational domain                                                                                           |                                     | 0.53                      |
